# Supplementary material
Source: publisher site journal article supplement (https://www.spandidos-publications.com/6867/downloadSupplementary)

Figure S1. Flow cytometry to determine the cell surface expression of HER family members, IGF IR, cMET and CD44 in LCCLs. The cell surface expression of various biomarkers in LCCLs is presented as a histogram. IGF IR, insulin-like growth factor 1 receptor; LCCLs, liver cancer cell lines.

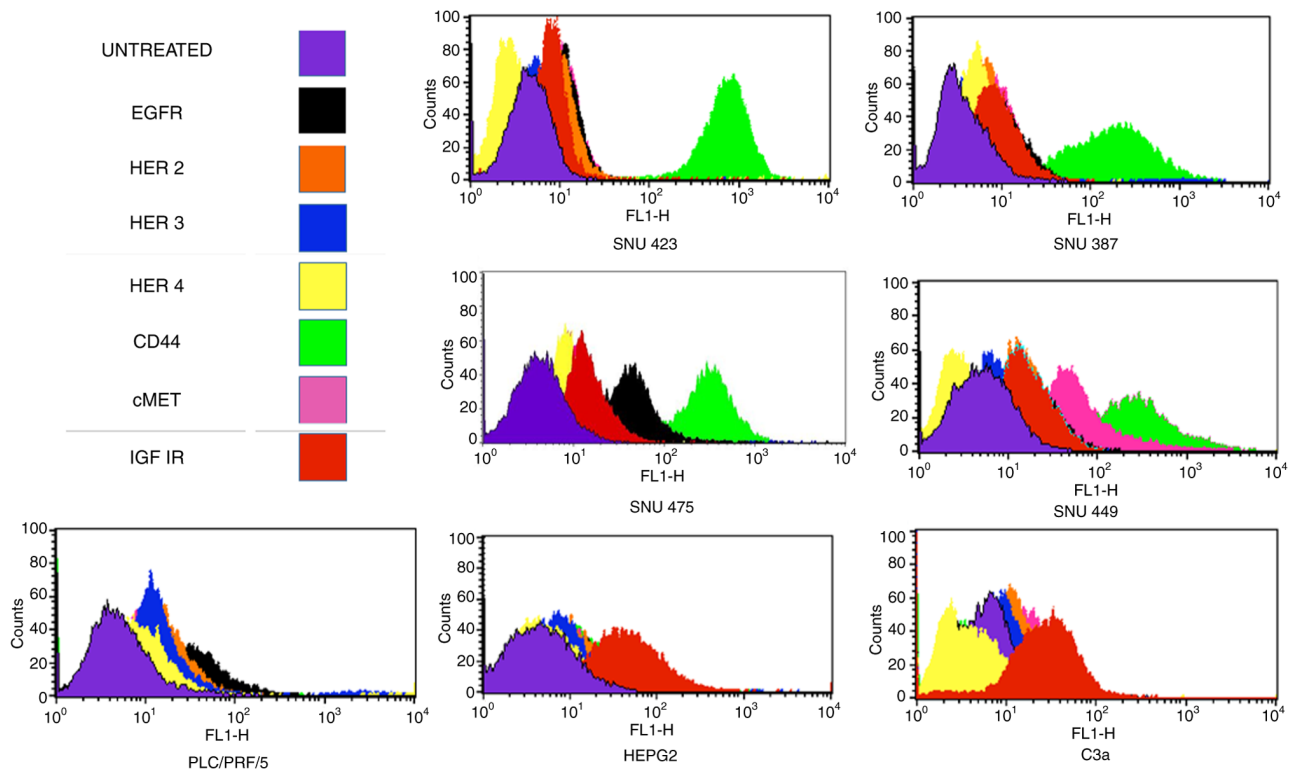

Supplement: Supplementary file 1 [file downloadSupplementary]
